# Supplementary material for: Hydroxyurea down‐regulates BCL11A, KLF‐1 and MYB through miRNA‐mediated actions to induce γ‐globin expression: implications for new therapeutic approaches of sickle cell disease
Source: Springer Nature journal article supplement (doi:10.1186/s40169-016-0092-7), 2016-04-07
Supplement: MOESM3 [file 10028372]

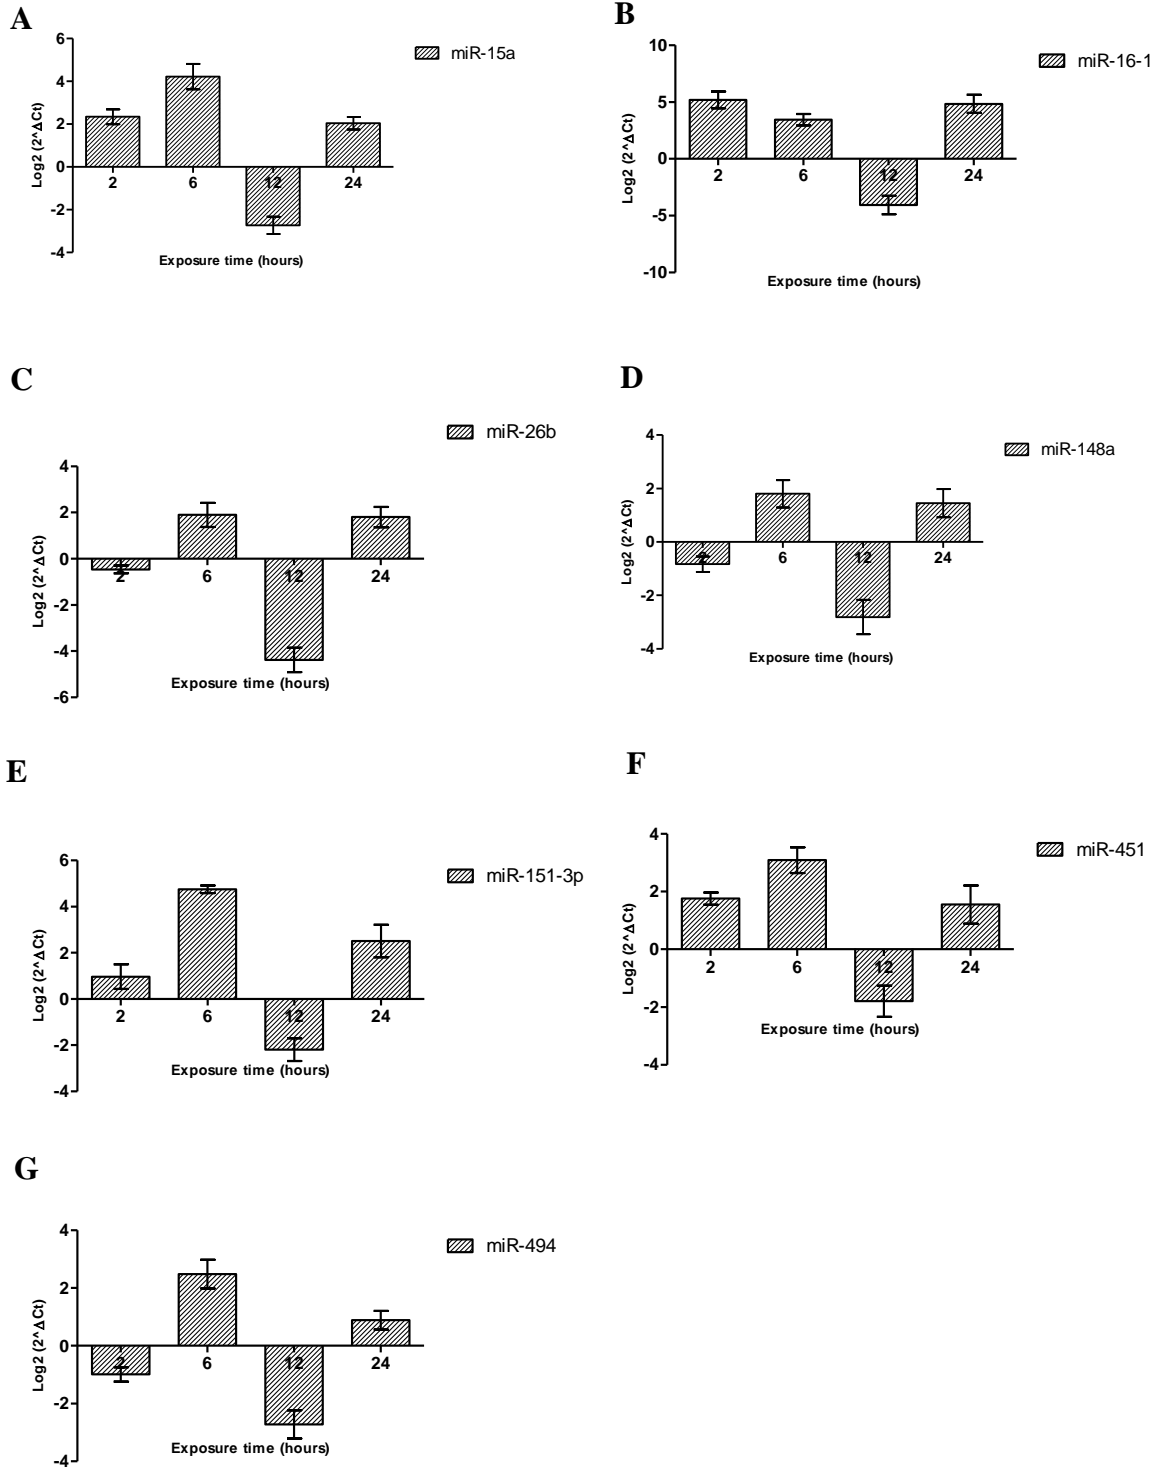

Supplementary Figure 3
